# Supplementary material for: Application of amplicon-based targeted sequencing with the molecular barcoding system to detect uncommon minor EGFR mutations in patients with treatment-naïve lung adenocarcinoma
Source: Springer Nature journal article supplement (doi:10.1186/s12885-019-5374-1), 2019-02-26

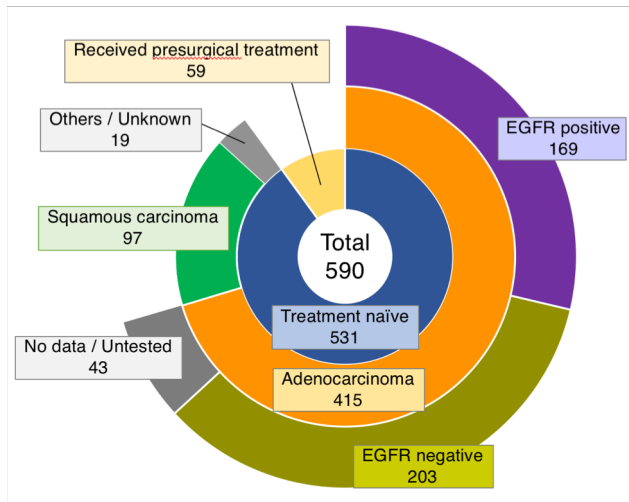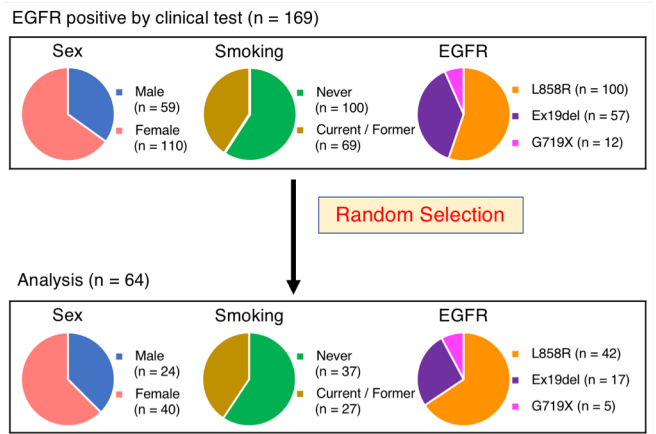

Supplement: MOESM1 [file 16509988]
