# Supplementary material for: Application of amplicon-based targeted sequencing with the molecular barcoding system to detect uncommon minor EGFR mutations in patients with treatment-naïve lung adenocarcinoma
Source: Springer Nature journal article supplement (doi:10.1186/s12885-019-5374-1), 2019-02-26

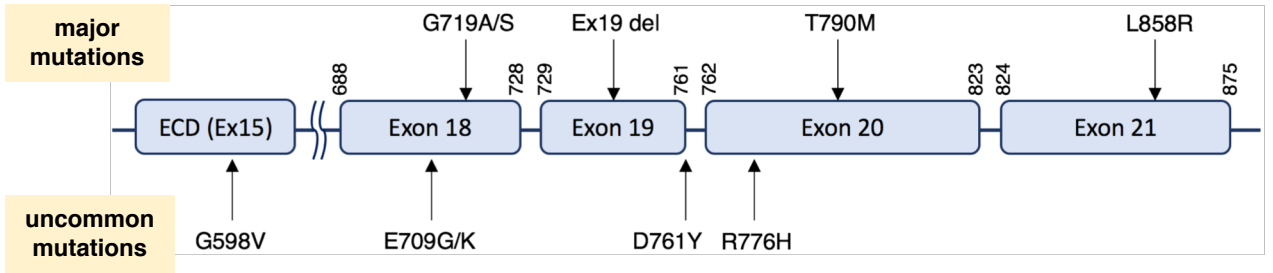

1877

E709K (c.2125G>A)

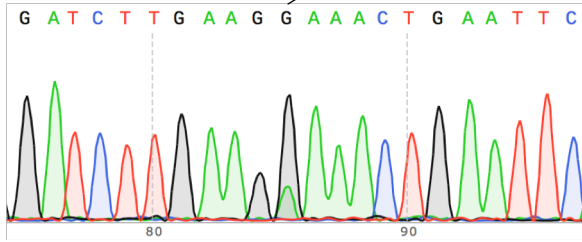

2312

E709G (c.2126A>G)

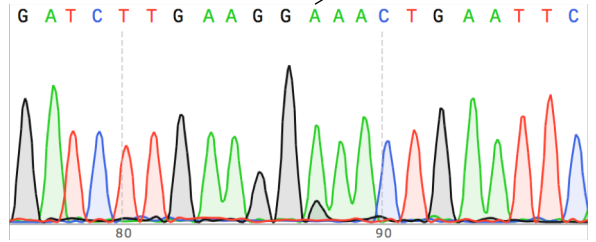

3013

E709G (c.2126A>G)

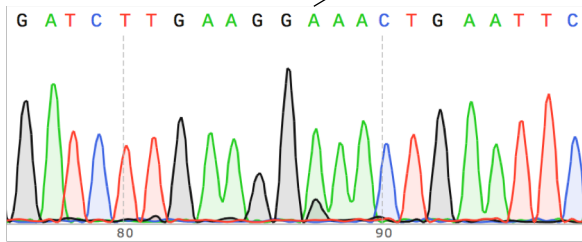

3290

E709G (c.2126A>G)

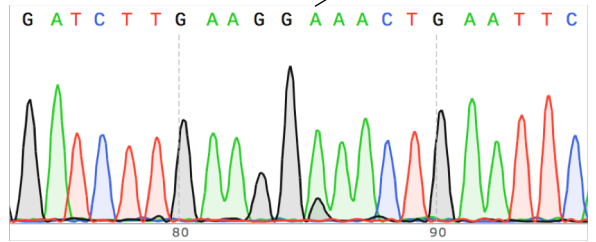

2921

D761Y (c.2281G>T)

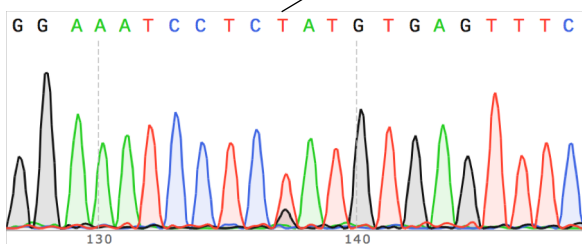

2233-1

R776H (c.2327G>A)

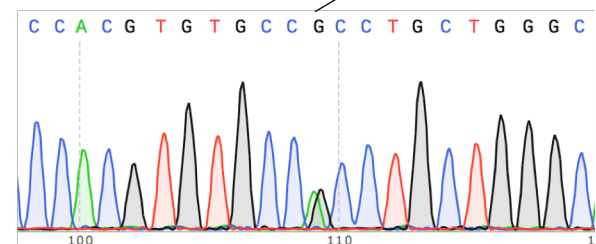

2294

G598V (c.1793G>T)

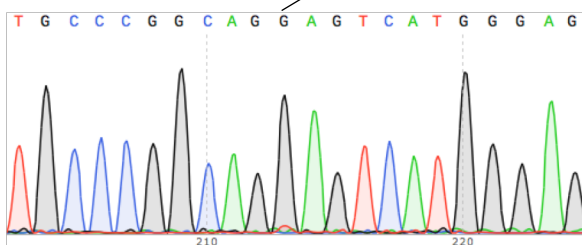

3236

T790M (c.2369C>T)

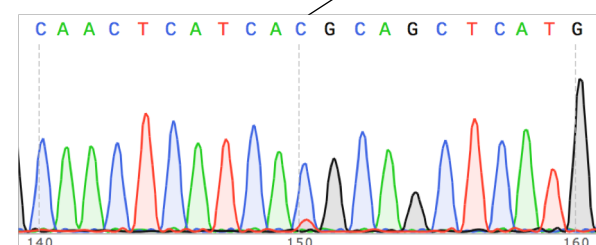

Supplement: MOESM6 [file 16509988]
