# Supplementary material for: Application of amplicon-based targeted sequencing with the molecular barcoding system to detect uncommon minor EGFR mutations in patients with treatment-naïve lung adenocarcinoma
Source: Springer Nature journal article supplement (doi:10.1186/s12885-019-5374-1), 2019-02-26
Supplement: MOESM8 [file 16509988]

A

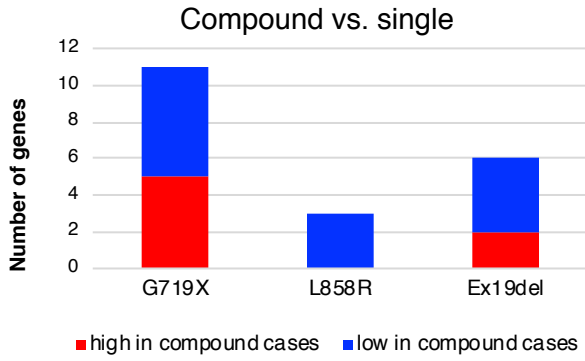

B

Compound vs. single

|          | G719X | L858R | Ex19del |
|----------|-------|-------|---------|
| HMGA2    | 6.4   | ND    | ND      |
| MIR205HG | 5.6   | ND    | ND      |
| LY6D     | 4.4   | ND    | ND      |
| PADI1    | 1.8   | ND    | ND      |
| NXPH4    | 1.3   | ND    | ND      |
| GSTM1    | ND    | ND    | 2.2     |
| IGKV6-21 | -1.3  | ND    | -1.5    |
| IGHV4-4  | -2.4  | -2.1  | 1.0     |
| CDKN2A   | -2.5  | ND    | ND      |
| FOXD1    | -3.5  | ND    | ND      |
| FGB      | -6.3  | ND    | -7.2    |
| SST      | -6.5  | ND    | -6.1    |
| PSPHP1   | ND    | -2.7  | ND      |
| CALML5   | ND    | -10.9 | -7.3    |

C

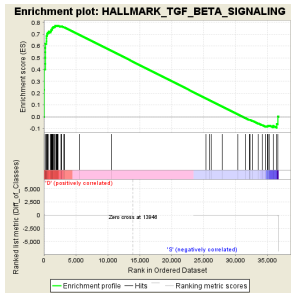

TGF-beta-signaling

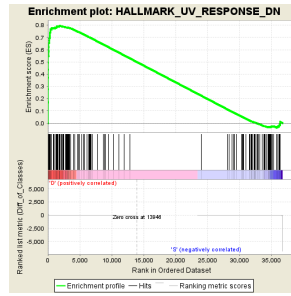

UV-response

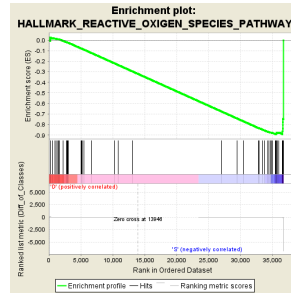

Reactive-oxygen

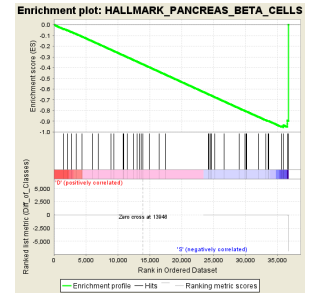

Pancreas\_beta\_cell
