# Supplementary material for: Application of amplicon-based targeted sequencing with the molecular barcoding system to detect uncommon minor EGFR mutations in patients with treatment-naïve lung adenocarcinoma
Source: BMC Cancer. 2019 Feb 26;19:175. doi: 10.1186/s12885-019-5374-1 (PMC6390598; doi:10.1186/s12885-019-5374-1)
Supplement: Supplementary file 2 — Table S1. ClearSeq Cancer Panel Gene List. (XLSX 10 kb) [file 12885_2019_5374_MOESM2_ESM.xlsx]

## Sheet: Table S1
Supplementary Table S1. ClearSeq Cancer Panel Gene List
#	Gene Symbol	#	Gene Symbol	#	Gene Symbol	#	Gene Symbol
1	ABL1	13	FANCA	25	JAK3	37	PIK3R1
2	AKT1	14	FANCC	26	KIT	38	PTEN
3	ALK	15	FANCF	27	KRAS	39	RET
4	AR	16	FANCG	28	MAP2K1	40	RUNX1
5	ATM	17	FGFR1	29	MAP2K2	41	SMAD4
6	BRAF	18	FGFR2	30	MAP2K4	42	SMO
7	CDKN2A	19	FGFR3	31	MET	43	SRC
8	CSF1R	20	FLT3	32	NOTCH1	44	STK11
9	CTNNB1	21	HRAS	33	NPM1	45	TP53
10	EGFR	22	IDH1	34	NRAS	46	VHL
11	ERBB2	23	IDH2	35	PDGFRA	47	WT1
12	ERBB4	24	JAK2	36	PIK3CA
