# Supplementary material for: Application of amplicon-based targeted sequencing with the molecular barcoding system to detect uncommon minor EGFR mutations in patients with treatment-naïve lung adenocarcinoma
Source: BMC Cancer. 2019 Feb 26;19:175. doi: 10.1186/s12885-019-5374-1 (PMC6390598; doi:10.1186/s12885-019-5374-1)
Supplement: Supplementary file 4 — Table S3. Patient characteristics. (XLSX 14 kb) [file 12885_2019_5374_MOESM4_ESM.xlsx]

## Sheet: Table S3
Supplementary Table S3. Patient characteristics
	Patient	Age range	Smoking	cStage	pT	pN	pStage	EGFR mutation (clinical test)	EGFR mutation (molecular barcoding)	Frequency (%)	Status	Recurrence	Selected for evaluation study*
1	2200	70-79	No	ⅠA	1a	0	ⅠA	Ex19 del	Ex19 del	20	Alive	No	● ○
2	2279	60-69	No	ⅠA	1a	0	ⅠA	Ex19 del	Ex19 del	25.6	Alive	No	● ○
3	2303	60-69	Yes	ⅠA	1a	0	ⅠA	L858R	L858R	12.4	Alive	No	● ○
4	2531	60-69	Yes	ⅠA	1b	0	ⅠA	Ex19 del	Ex19 del	1.4	Alive	No	● ○
5	1873	70-79	Yes	ⅠA	1b	0	ⅠA	L858R	L858R	3.1	Alive	No	● ○
6	3236	70-79	Yes	ⅡA	1b	0	ⅠA	L858R	L858R	13.2	Alive	No	● ○
7	1874	70-79	Yes	ⅠA	1a	0	IA	G719S	G719S	12.1	Alive	No	○
8	1877	70-79	No	ⅠA	1a	0	ⅠA	G719S	G719S	11.8	Alive	No	○
9	1905	70-79	Yes	ⅠA	1a	0	ⅠA	Ex19 del	Ex19 del	39	Alive	No	○
10	2043	< 50	No	ⅠA	1a	0	ⅠA	Ex19 del	Ex19 del	13.9	Alive	No	○
11	2069	60-69	Yes	ⅠA	1a	0	ⅠA	L858R	L858R	9.6	Alive	No	○
12	2283	50-59	Yes	ⅠA	1a	0	ⅠA	L858R	L858R	17.8	Alive	No	○
13	2251	60-69	No	ⅠA	1b	0	ⅠA	Ex19 del	Ex19 del	13.3	Alive	No	○
14	2281	60-69	Yes	ⅠB	1b	0	ⅠA	L858R	L858R	24.5	Alive	No	○
15	2309	70-79	No	ⅠA	1b	0	ⅠA	Ex19 del	Ex19 del	31.4	Alive	No	○
16	2394	70-79	Yes	ⅠA	1b	0	ⅠA	Ex19 del	Ex19 del	10.6	Alive	No	○
17	1977	70-79	No	ⅠB	2a	0	ⅠB	Ex19 del	Ex19 del	6.5	Alive	No	○
18	2189	60-69	No	ⅡA	2a	0	ⅠB	L858R	L858R	7.6	Alive	No	○
19	1994	70-79	No	ⅠB	2a	1	ⅡA	Ex19 del	Ex19 del	66.7	Alive	No	○
20	2282	< 50	Yes	ⅠA	2a	1	ⅡA	Ex19 del	Ex19 del	22.6	Alive	Yes	○
21	2312	60-69	No	ⅡB	2b	0	ⅡA	L858R	L858R	13.3	Alive	Yes	○
22	1819	70-79	Yes	ⅠB	2a	2	ⅢA	L858R	L858R	14.3	Dead	Yes	○
23	2013	60-69	Yes	ⅡB	4	1	ⅢA	L858R	L858R	20.7	Alive	Yes	○
24	2921	50-59	No	ⅠB	1a	2	ⅢA	G719A	G719A	19.4	Alive	Yes	○
25	3013	50-59	No	ⅠB	3	0	ⅡB	L858R	L858R	20.4	Dead	No	○
26	3290	60-69	No	ⅠA	3	0	ⅡB	L858R	L858R	20.2	Alive	No	○
27	3347	60-69	Yes	ⅠA	1a	2	ⅢA	L858R	L858R	16.9	Alive	Yes	○
28	3412	50-59	No	IIA	1a	2	ⅢA	Ex19 del	Ex19 del	44.3	Alive	No	○
29	1914	70-79	Yes	ⅠA	1a	0	ⅠA	L858R	L858R	12.7	Alive	Yes
30	1916	60-69	No	ⅠA	1a	0	ⅠA	Ex19 del	Ex19 del	7.8	Alive	No
31	1925	50-59	Yes	ⅠA	1a	0	ⅠA	L858R	L858R	15.1	Alive	No
32	2002	70-79	No	ⅠA	1a	0	ⅠA	L858R	L858R	70.3	Alive	Yes
33	2007	50-59	No	ⅠB	1a	0	ⅠA	L858R	L858R	27.3	Alive	No
34	2054	60-69	No	ⅠA	1a	0	ⅠA	L858R	L858R	8.2	Alive	No
35	2066	60-69	No	ⅠA	1a	0	ⅠA	L858R	L858R	2	Alive	No
36	2085	< 80	Yes	ⅠA	1a	0	ⅠA	L858R	L858R	14.5	Dead	No
37	2099	50-59	No	ⅠA	1a	0	ⅠA	L858R	L858R	14.3	Alive	No
38	2129	70-79	Yes	ⅠA	1a	0	ⅠA	L858R	L858R	11.6	Alive	No
39	2024	60-69	No	ⅠA	1a	0	ⅠA	L858R	L858R	2.2	Alive	No
40	2173	60-69	No	ⅠA	1a	0	ⅠA	L858R	L858R	27.4	Alive	No
41	2218	60-69	Yes	ⅠA	1a	0	ⅠA	L858R	L858R	6.9	Alive	No
42	2229	60-69	Yes	ⅠA	1a	0	ⅠA	L858R	L858R	26.2	Alive	No
43	2294	70-79	Yes	ⅠA	1a	0	ⅠA	L858R	L858R	6.56	Alive	No
44	2301	70-79	Yes	ⅠA	1a	0	ⅠA	L858R	L858R	31.6	Alive	No
45	2306	50-59	Yes	ⅠA	1a	0	ⅠA	L858R	L858R	17.5	Alive	No
46	2336	70-79	No	ⅠA	1a	0	ⅠA	Ex19 del	Ex19 del	9.9	Alive	Yes
47	2342	50-59	No	ⅠA	1a	0	ⅠA	Ex19 del	Ex19 del	28.4	Alive	No
48	1961	70-79	Yes	ⅠA	1b	0	ⅠA	L858R	L858R	4.2	Alive	No
49	1962	> 80	No	ⅡA	1b	0	ⅠA	Ex19 del	Ex19 del	33.1	Alive	No
50	2040	60-69	No	ⅡA	1b	0	ⅠA	L858R	L858R	7.9	Alive	No
51	2094	60-69	No	ⅠA	1b	0	ⅠA	L858R	L858R	23.1	Alive	No
52	1918	50-59	No	ⅡA	2a	0	ⅠB	L858R	L858R	6.2	Alive	No
53	1933	> 80	No	ⅠA	2a	0	ⅠB	L858R	L858R	19.6	Alive	No
54	1959	60-69	No	ⅠB	2a	0	ⅠB	L858R	L858R	18	Alive	No
55	1974	60-69	No	ⅠB	2a	0	ⅠB	L858R	L858R	50.3	Alive	Yes
56	2008	< 50	No	ⅠB	2a	0	ⅠB	L858R	L858R	13.6	Alive	No
57	2067	> 80	No	ⅠB	2a	0	ⅠB	L858R	L858R	7.9	Alive	No
58	2136	60-69	No	ⅠB	2a	0	ⅠB	L858R	L858R	15.1	Alive	No
59	2160	> 80	Yes	ⅠB	2a	0	ⅠB	L858R	-	-	Alive	Yes
60	2209	70-79	No	ⅠB	2a	0	ⅠB	G719A	G719A	4.5	Alive	No
61	2225	60-69	No	ⅡA	2a	0	ⅠB	Ex19 del	Ex19 del	46.8	Alive	No
62	2233	60-69	No	ⅠB	2a	0	ⅠB	G719S	G719S	30.9	Alive	No
63	2310	70-79	Yes	ⅠA	2a	0	ⅠB	L858R	L858R	39.8	Alive	No
64	3161	70-79	No	ⅠB	2a	2	ⅢA	L858R	L858R	62.8	Alive	No
*●: selected for Figure 1B, 1C ○: selected for Figure 2A
